# Supplementary material for: Injectable zwitterionic cryogels for accurate and sustained chemoimmunotherapy
Source: Royal Society of Chemistry journal article supplement (doi:10.1039/d3tb00170a), 2023-01-01
Supplement: d3tb00170a2.pdf [file d3tb00170a2.pdf]

# Supporting Information

*of*

## Injectable Zwitterionic Cryogels for Accurate and Sustained Chemoimmunotherapy

Zhang Jing\*, Lu Jie, Qian Sunxiang, Ni Haifeng, Feng Jie\*

*College of Materials Science and Engineering, Zhejiang University of Technology,  
Hangzhou, Zhejiang, 310014, P. R. China*

\*Corresponding authors:

Email : zhangjing@zjut.edu.cn (J. Zhang), fengjie@zjut.edu.cn (J. Feng).

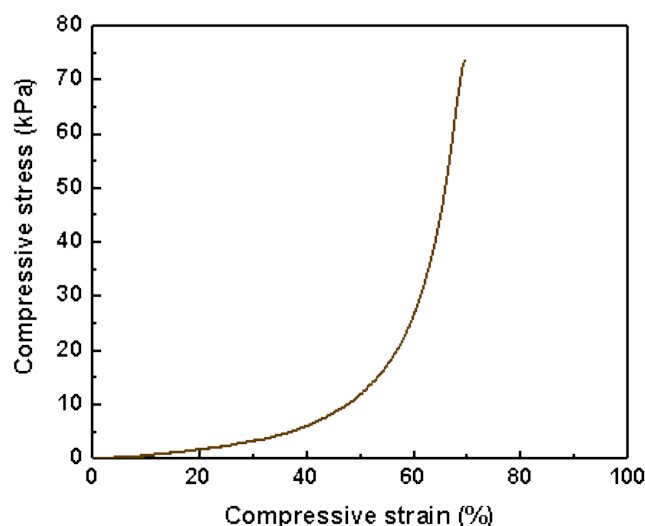

**Fig. S1** The compressive stress-strain curve of the SH hydrogels.

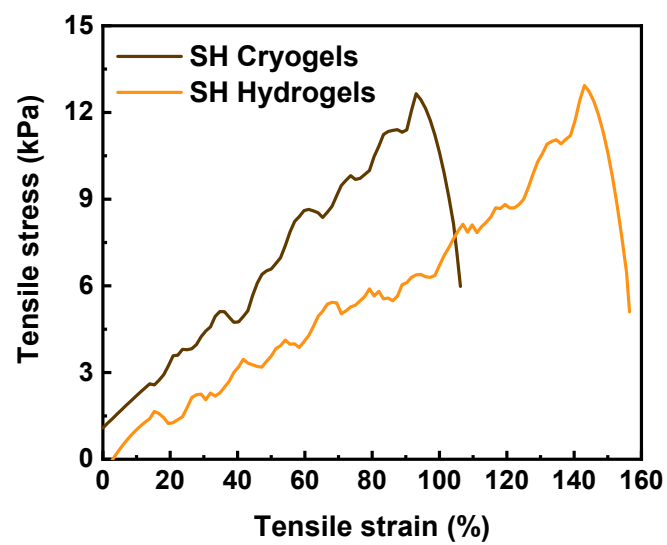

**Fig. S2** The tensile stress-strain curves of the SH cryogels and SH hydrogels.

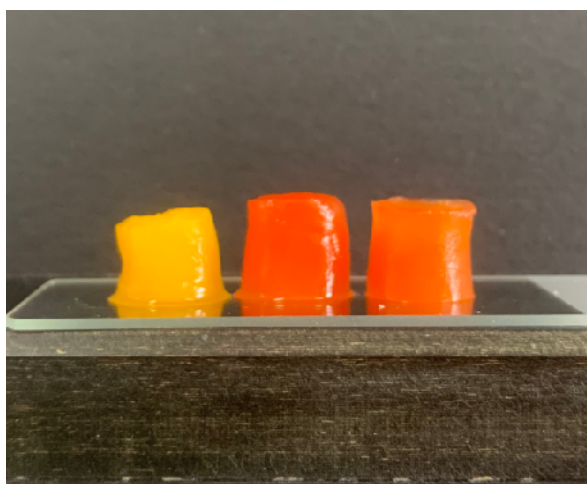

**Fig. S3** Photograph of the SH@CUR cryogels, the SH@DOX cryogels and the SH@[DOX+CUR+GM-CSF] cryogels (left to right).

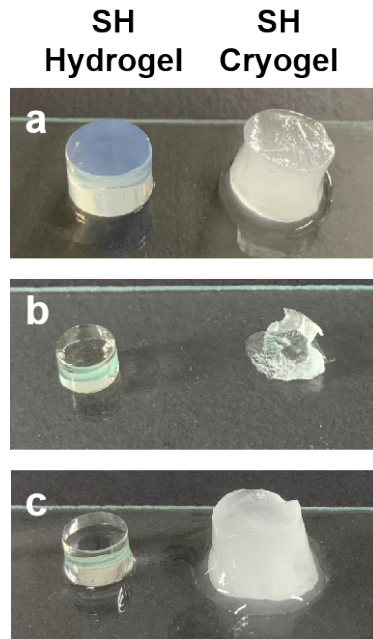

**Fig. S4** Photographs of initial morphologies of the SH hydrogel and the SH cryogel (a), morphologies after stood at room temperature for 7 days (b) and subsequent swelling for 3 hours (c).

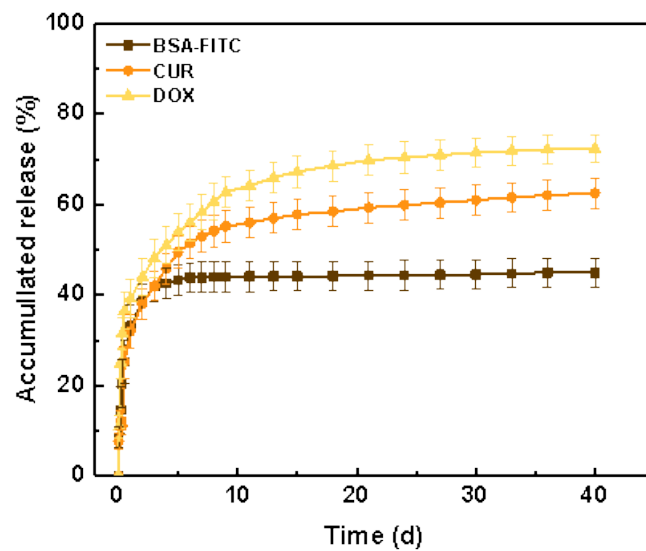

**Fig. S5** In vitro accumulated release of FITC-BSA, CUR and DOX from SH hydrogels in pH = 7.4 PBS.
